# Supplementary material
Source: PubMed Central journal article supplement (PMC4872636)
Supplement: ac6b00381_si_001.pdf [file ac6b00381_si_001.pdf]

# **RNA extraction from a mycobacterium under ultrahigh electric field intensity in a microfluidic device**

Sai Ma <sup>a</sup>, Bryan D. Bryson <sup>b</sup>, Chen Sun <sup>a</sup>, Sarah M. Fortune <sup>b</sup>, Chang Lu <sup>c,\*</sup>

a. Department of Biomedical Engineering and Mechanics, Virginia Tech, Blacksburg, VA 24061, USA

b. Department of Immunology and Infectious Diseases, Harvard School of Public Health, Boston, MA 02115, USA

c. Department of Chemical Engineering, Virginia Tech, Blacksburg, VA 24061, USA

Corresponding author: \*Email: changlu@vt.edu

**Supporting Information:** Fig. S1-S5, Table S1 and Video S1

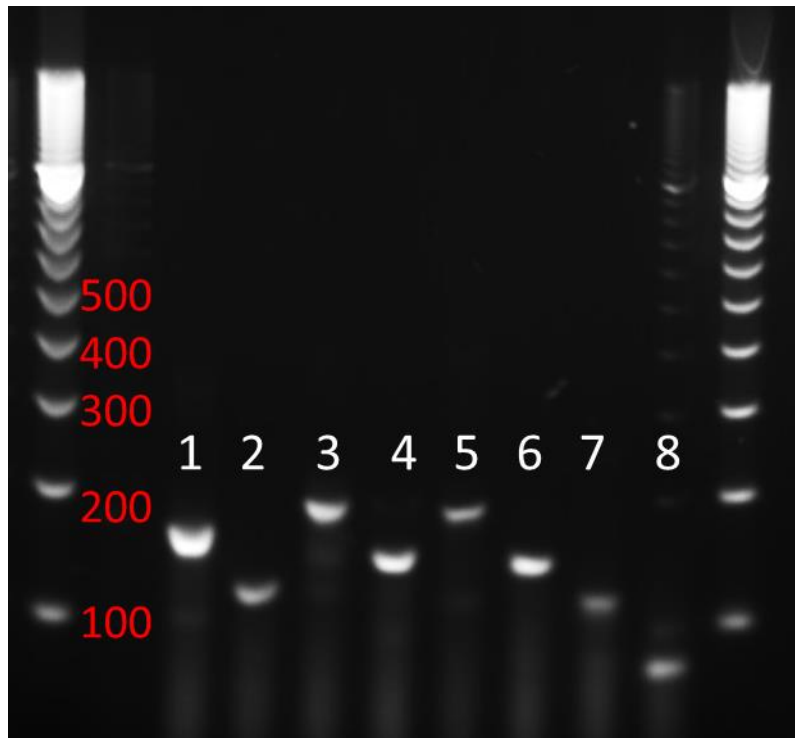

**Fig. S1** RT-PCR product using the primers in **Table S1** and the primers containing added T7 promoter sequences. The RT-PCR products generated using primers containing T7 promoter sequences were 40 bp longer than the DNA templates generated using primers in **Table S1**. PCR products and 100 bp DNA ladder (Biorad) were loaded on 2% agarose gel. The PCR products containing T7 promoter sequences were in Lane 1 (SigA), 3 (ClpX), 5 (DnaE) and 7 (KatG). The PCR products without T7 promoter sequence (using primers in **Table S1**) were in Lane 2 (SigA), 4 (ClpX), 6 (DnaE) and 8 (KatG).

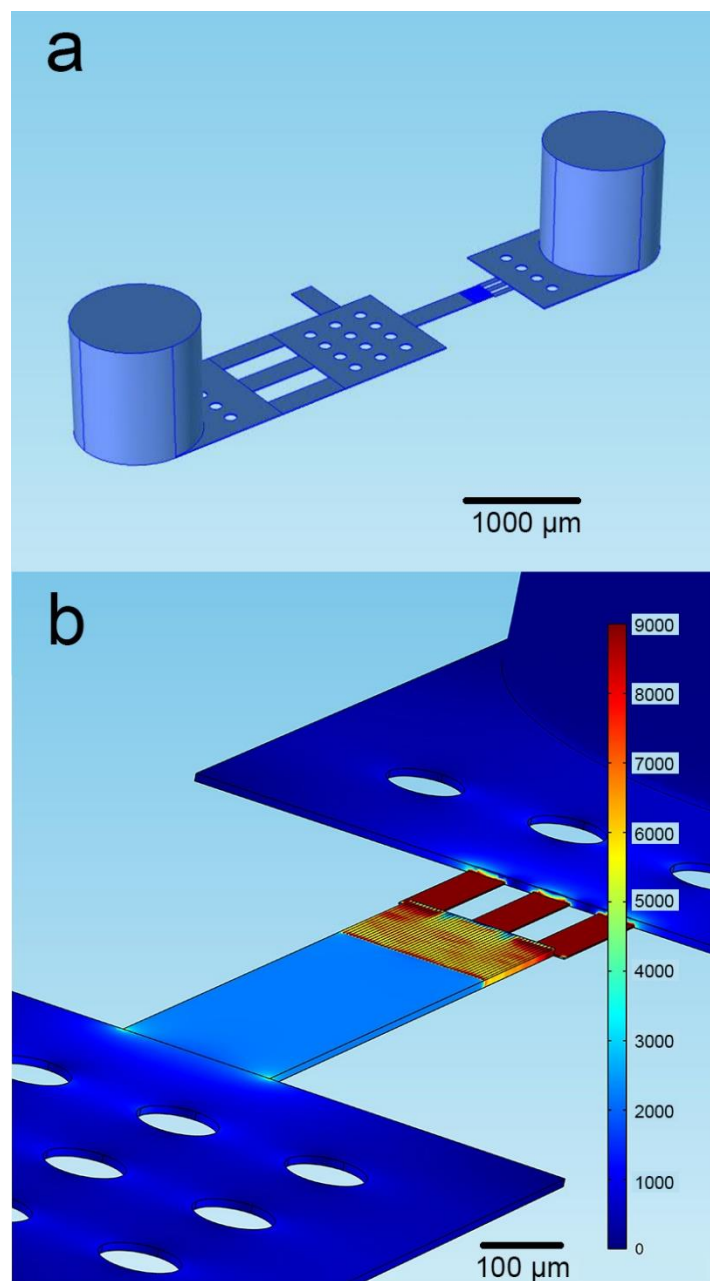

**Fig. S2** COMSOL Multiphysics modelling of electric field intensity in the electrolysis channel with packed beads. (a) The overview of the modelled structure. (b) A zoom-in image of the electrolysis channel with 786 V DC voltage applied across the two reservoirs. The average field intensity in the space among beads was 6000 V/cm.

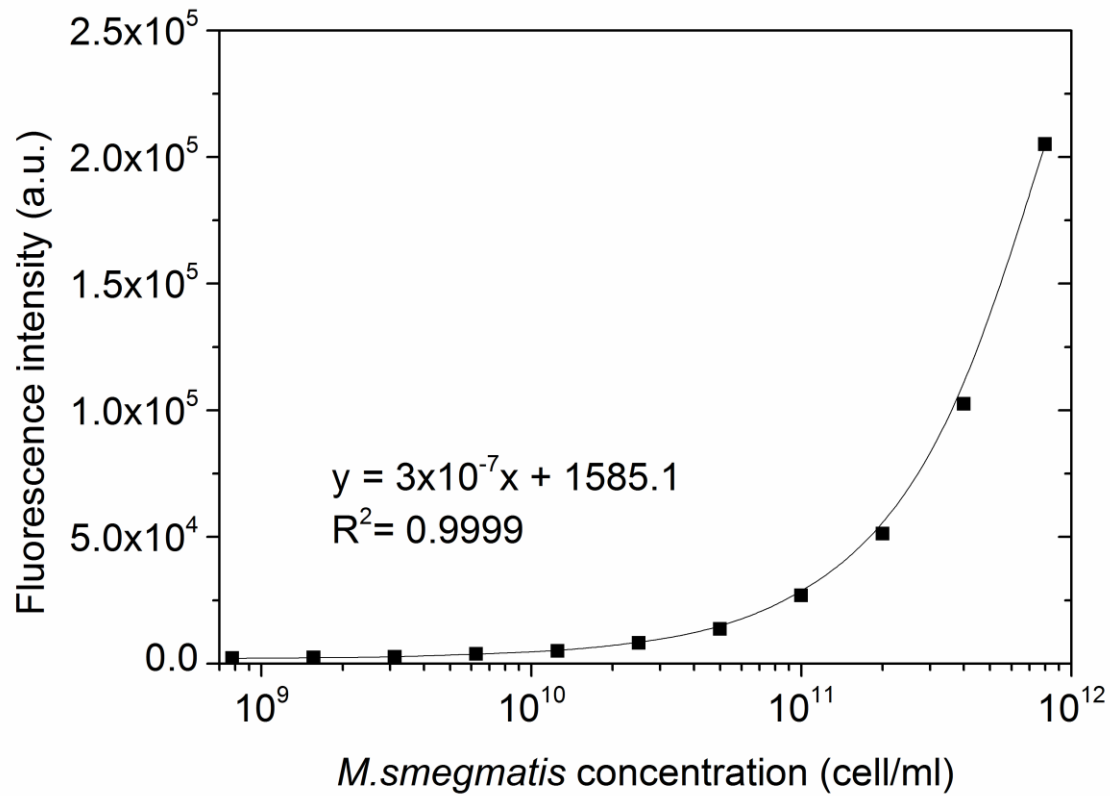

**Fig. S3** A standard curve for quantifying mycobacterium concentrations in the electrolysis channel. GFP expressing *M. smegmatis* with different concentrations were loaded in a straight microfluidic channel with the same depth as the electrolysis channel. The fluorescence intensity was calculated based on z-stacking of 10 images.

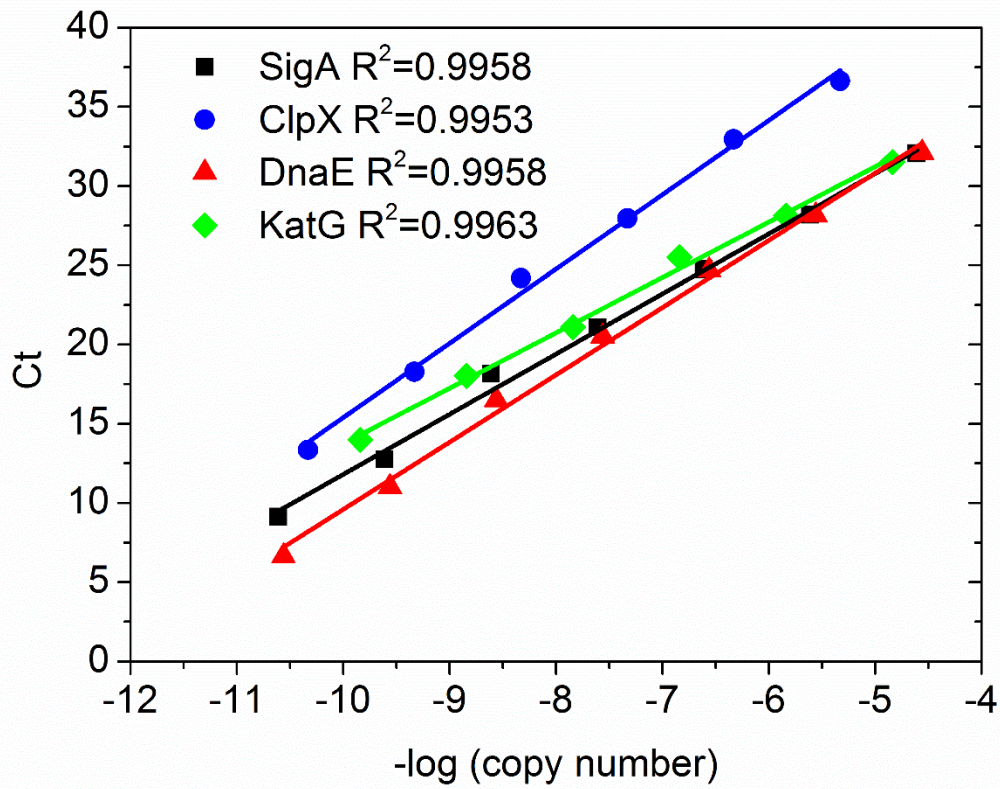

**Fig. S4** The qPCR standard curves for all 4 mRNAs established using *in-vitro* synthesized RNA with known copy numbers (obtained by a Qubit 2.0 fluorometer).

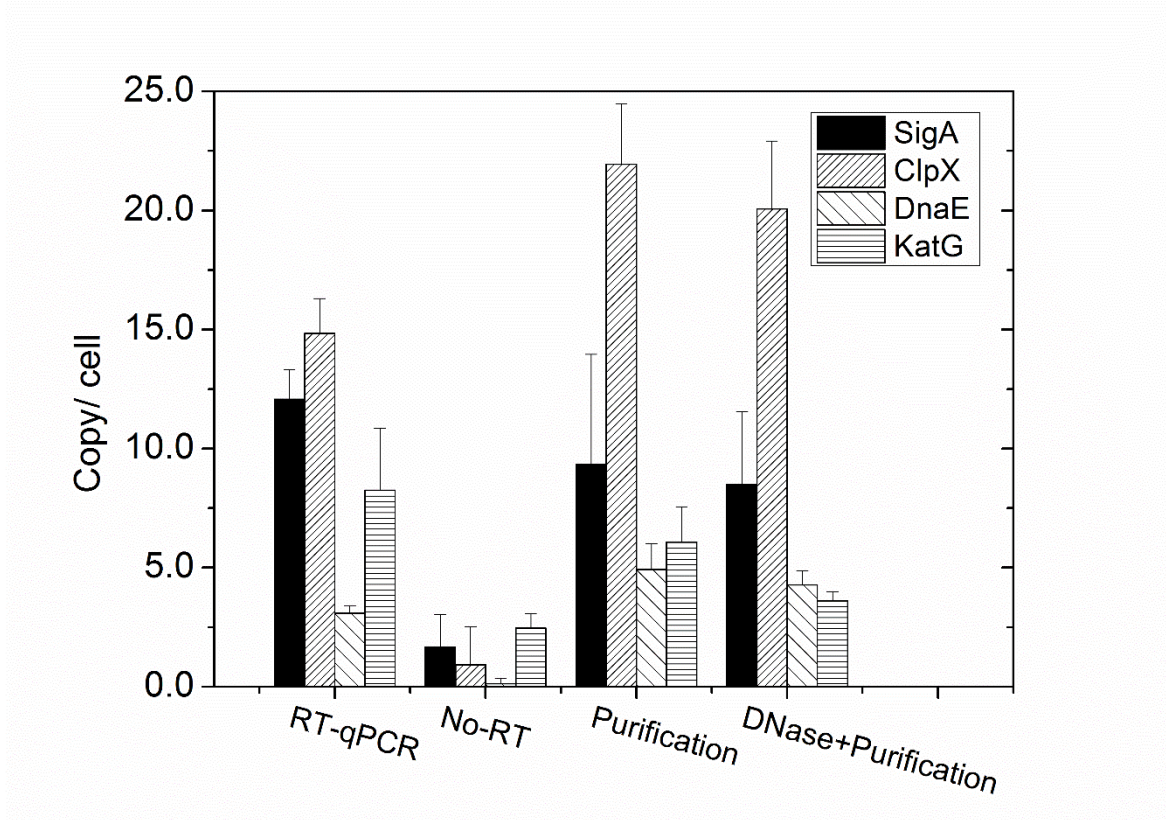

**Fig. S5** The effect of DNA templates in the lysate on RT-qPCR results. All samples were extracted by applying 30 pulses of 6000 V/cm at 5 s duration from roughly  $2 \times 10^5$  *M.smegmatis* cells (N=3). “No-RT” was performed without reverse transcription step. “Purification” was performed by purifying the sample using phenol/chloroform extraction, ethanol precipitation and resuspended in 20  $\mu$ l water. “DNase+Purification” was performed by first treating the sample with 0.02 U/ $\mu$ l DNase I at 37  $^{\circ}$ C for 10 min, stopped by adding EDTA (at a concentration of 5 mM) and incubated at 75  $^{\circ}$ C for 10 min. The sample was then purified by phenol/chloroform extraction and ethanol precipitation. Based on comparisons between RT-qPCR and No-RT, we conclude that the fractions of RNA copy per cell values generated by DNA templates in the lysate are 14% for SigA, 6% for ClpX, 4% for DnaE and 30% for KatG.

**Table S1** The primer sequences used in qRT-PCR.

| <b>mRNA</b> | <b>Forward primer sequences</b> | <b>Reverse primer sequences</b> |
|-------------|---------------------------------|---------------------------------|
| SigA        | GACTACACCAAGGGCTACAAG           | TTGATCACCTCGACCATGTG            |
| ClpX        | TGACCAAGTCCAACATCCTG            | CAACATCCTCACCGACGTAG            |
| DnaE        | CGTCTACCAAGAGCAGATCATG          | TTCCTTGAAGCCCTTGTACTC           |
| KatG        | GACCGCGAATGACCTTGTGT            | TGTCGGACTGGGCATAAACC            |

**Video S1** On-chip electric lysis of GFP-expressing *M. smegmatis*. 30 electrical pulses (5 s each with an intensity of 6000 V/cm) were applied. The video was taken under fluorescence imaging at the rate of 1 image per 3.5 s and was played at 10 frames per second.
